# Supplementary material for: Inhibition of NETosis via PAD4 alleviated inflammation in giant cell myocarditis
Source: PubMed Central journal article supplement (PMC10391931; doi:10.1016/j.isci.2023.107162), 2023-06-16
Supplement: mmc1.pdf [file mmc1.pdf]

iScience, Volume 26

## **Supplemental information**

### **Inhibition of NETosis via PAD4**

#### **alleviated inflammation in giant cell myocarditis**

**Zhan Hu, Xiumeng Hua, Xiuxue Mo, Yuan Chang, Xiao Chen, Zhenyu Xu, Mengtao Tao, Gang Hu, and Jiangping Song**

# 1 Supplemental Information

## 2 Supplementary Tables:

3 **Table S1. Related to Figure 1B.** The cell number in the study before/after QC.

4 **Table S2. Related to Figure 1B.** The transcriptional condition and percentage of cell clusters  
5 of immune cells.

6 **Table S3. Related to Figure 2D.** The associated genes which were used in macrophage  
7 analysis.

8 **Table S4. Related to Figure 5C.** Baseline characteristics of GCM and DCM.

9 **Table S5. Related to Figure 6A.** Imaging mass cytometry antibody panel.

10 **Table S6. Related to Figure 2A and 2C.** Compare macrophages between cardiac sarcoidosis and  
11 giant cell myocarditis.

12

## 13 Supplementary Figures:

14 **Figure S1. Related to Figure 1A.** The phenotype of GCM.

15 **Figure S2. Related to Figure 1A.** The live immune cell percentage derived by flow cytometry  
16 analysis.

17 **Figure S3 Related to Figure 1B.** The gene and UMI distributions in CTL and GCM.

18 **Figure S4. Related to Figure 1B.** Feature plots of hallmark genes to identify the cell types.

19 **Figure S5. Related to Figure 2A.** Feature plots of hallmark genes to identify the macrophages  
20 origin.

21 **Figure S6. Related to Figure 4D.** Intercellular communication network analysis revealed that  
22 the roles of NETosis in GCM.

23 **Figure S7 Related to Figure 4D.** CXCL chemokines expression in cell clusters from different  
24 groups.

25 **Figure S8 Related to Figure 6A.** Single color staining of 35-marker panel.

26 **Figure S9 Related to Figure 2A and 2C.** Compare macrophages clusters between GCM and  
27 CS.

1 **Table S1. The cell number in the study before/after QC**

| <b>Groups</b> | <b>Expression library detected cells</b> | <b>Discard cell number QC</b> | <b>Cells number after QC</b> | <b>Proportion of total cells in analysis</b> |
|---------------|------------------------------------------|-------------------------------|------------------------------|----------------------------------------------|
| CTL           | 9,046                                    | 480                           | 8,566                        | 54.51%                                       |
| GCM           | 7,786                                    | 638                           | 7,148                        | 45.49%                                       |
| Sum           | 16,832                                   | 1,118                         | 15,714                       | 100.00%                                      |

2

3 **Table S2. The transcriptional condition and percentage of cell clusters of immune cells**

| <b>Cluster ID</b> | <b>Cell Type</b>     | <b>CTL</b> | <b>GCM</b> | <b>Average nGene</b> | <b>Average nUMI</b> |
|-------------------|----------------------|------------|------------|----------------------|---------------------|
| 0                 | Neutrophils (Neu_1)  | 1.39%      | 98.61%     | 766                  | 2,598               |
| 1                 | NK Cells (NK_1)      | 94.99%     | 5.01%      | 1,733                | 5,913               |
| 2                 | Macrophage (Macro_1) | 0.36%      | 99.64%     | 2,968                | 16,935              |
| 3                 | Macrophage (Macro_2) | 4.56%      | 95.44%     | 3,435                | 19,961              |
| 4                 | Macrophage (Macro_3) | 94.99%     | 5.01%      | 1,635                | 4,690               |
| 5                 | Neutrophils (Neu_2)  | 71.39%     | 28.61%     | 850                  | 2,826               |
| 6                 | T Cells (T_1)        | 97.77%     | 2.23%      | 1,383                | 4,316               |
| 7                 | Macrophage (Macro_4) | 84.84%     | 15.16%     | 2,261                | 9,710               |
| 8                 | Macrophage (Macro_5) | 24.61%     | 75.39%     | 2,213                | 10,842              |
| 9                 | T Cells (T_2)        | 20.23%     | 79.77%     | 1,824                | 6,651               |
| 10                | Neutrophils (Neu_3)  | 0.00%      | 100.00%    | 735                  | 3,122               |
| 11                | T Cells (T_3)        | 81.66%     | 18.34%     | 1,524                | 5,331               |
| 12                | cDC                  | 88.70%     | 11.30%     | 2,805                | 14,764              |
| 13                | B Cells              | 98.46%     | 1.54%      | 1,163                | 3,036               |
| 14                | DC                   | 13.33%     | 86.67%     | 2,768                | 15,183              |

|    |                                    |         |        |       |        |
|----|------------------------------------|---------|--------|-------|--------|
| 15 | NK Cells (NK_2)                    | 95.94%  | 4.06%  | 1,731 | 5,505  |
| 16 | NK Cells (NK_3)                    | 100.00% | 0.00%  | 1,933 | 7,376  |
| 17 | cDC                                | 61.19%  | 38.81% | 3,229 | 18,914 |
| 18 | Lymphoid progenitors               | 74.23%  | 25.77% | 3,152 | 15,102 |
| 19 | Endothelial                        | 95.42%  | 4.58%  | 2,121 | 6,898  |
| 20 | T Cells (T_4)                      | 19.27%  | 80.73% | 2,232 | 9,069  |
| 21 | Granulocyte-macrophage progenitors | 77.91%  | 22.09% | 3,516 | 18,551 |
| 22 | ILC2                               | 96.47%  | 3.53%  | 1,433 | 5,165  |
| 23 | pDC                                | 25.68%  | 74.32% | 3,000 | 11,409 |
| 24 | Fibroblasts                        | 89.13%  | 10.87% | 2,065 | 6,956  |

1

2 **Table S3. The associated genes which were used in macrophage analysis**

| ISG scores |        |        | Phagocytosis | Inflammation |
|------------|--------|--------|--------------|--------------|
| STAT1      | IDO1   | BATF2  | P2Y2         | CHUK         |
| FBXO6      | GBP6   | IFI44L | CX3CR1       | FADD         |
| PARP10     | STAT2  | XAF1   | GPR132       | IKBKB        |
| OAS2       | TIMM10 | OASL   | LRP1         | IKBKG        |
| TRIM22     | STAT1  | IFI44  | CD14         | IL1A         |
| PARP10     | PARP12 | OAS2   | CD36         | IL1R1        |
| GBP3       | PARP9  | TRIM6  | BAI1         | IRAK1        |
| ZNF684     | GBP1   | HES4   | TIMD4        | MAP3K1       |
| CARD17     | GBP4   | OTOF   | STAB1        | MAP3K14      |
| GALM       | IFIH1  | IFI44L | MERTK        | MAP3K7       |
| DHX58      | IRF7   | DDX60  | AXL          | MYD88        |
| CEACAM1    | PARP14 | IFITM3 | CD209        | NFKB1        |
| UBE2L6     | IFIT2  | IFIT3  | CD163        | NFKBIA       |

|         |         |          |         |          |
|---------|---------|----------|---------|----------|
| CEACAM1 | IFI35   | CXCL10   | NR1H3   | RELA     |
| APOL6   | STAT1   | SERPING1 | MSR1    | RIPK1    |
| SOCS1   | IFIT5   | SPATS2L  | CD169   | TAB1     |
| DDX58   | ZNFX1   | RSAD2    | GULP1   | TLR4     |
| UBE2L6  | PHF11   | LY6E     | ELMO1   | TNF      |
| TNFAIP6 | ACTA2   | OAS1     | ITGAV   | TNFAIP3  |
| REC8    | SP140   | IFIT1    | ITGB5   | TNFRSF1A |
| RNF213  | ABCA1   | IFIT3    | DOCK1   | TNFRSF1B |
| ISG20   | TCN2    | OAS3     | RAC     | TRADD    |
| DYNLT1  | ZC3HAV1 | OAS1     | RHOG    | TRAF6    |
| TRIM56  | HSH2D   | OASL     | LAMP1   |          |
| SP140   | GBP2    | CMPK2    | LAMP2   |          |
| TRIM38  | TRIM5   | HERC5    | RAB7    |          |
| PSMB9   | RHBDF2  | OAS1     | RAB5    |          |
| CPT1B   | TMEM140 | MX1      | SIGLEC1 |          |
| BST2    | ADAR    | 4-Sep    | ITGAM   |          |
| NMI     | BTN3A1  | HERC6    | ITGAX   |          |
| RBCK1   | LGALS9  | IFITM1   | ITGA5   |          |
| TRAFD1  | NBN     | TRIM5    | CLEC7A  |          |
| TRIM21  | TYMP    | EIF2AK2  | SCARF1  |          |
| CARD16  | SRBD1   | AIM2     | C1QA    |          |
| CHMP5   | NCOA7   | MT1A     | C1QB    |          |
| TAP2    | UNC93B1 | MOV10    | C1QC    |          |
| SP110   | SP100   | CCL8     | CALR    |          |
| GADD45B | DHRS9   | HELZ2    | C1QR    |          |
| TAP1    | TRANK1  | ZBP1     | FCGR1A  |          |
| TRIM5   | WARS    |          | FCGR2A  |          |

|        |         |  |        |  |
|--------|---------|--|--------|--|
| NT5C3A | LAP3    |  | FCGR2B |  |
| ASPRV1 | TNFSF10 |  | FCGR3A |  |
| IRF9   | GBP1    |  | FCGR3B |  |

1

2 **Table S4. Baseline characteristics of GCM and DCM**

| Characteristics                      | GCM        | DCM        | P value |
|--------------------------------------|------------|------------|---------|
| Number                               | 3          | 9          |         |
| Demography                           |            |            |         |
| Male (No. %)                         | 3 (100%)   | 5 (55.6%)  | 0.49    |
| Age (year)                           | 42.3±7.2   | 25.9±17.1  | 0.28    |
| BMI                                  | 24.9±2.5   | 20.0±2.5   | 0.01    |
| Clinical characteristics             |            |            |         |
| Diagnosis to transplantation(months) | 6.7±3.1    | 66.1±90.6  | 0.28    |
| Cardiac function                     |            |            |         |
| I                                    | 0 (0%)     | 0 (0%)     | -       |
| II                                   | 1 (33.3%)  | 2 (22.2%)  | 1.00    |
| III                                  | 1 (33.3%)  | 3 (33.3%)  | 1.00    |
| IV                                   | 1 (33.3%)  | 4 (44.4%)  | 1.00    |
| SBP (mmHg)                           | 102.7±24.0 | 92.78±12.8 | 0.60    |
| Heart rate                           | 92.3±10.5  | 89±11.0    | 0.73    |
| History of viral infections          |            |            |         |
| virus infection within 6 months      | 1 (33.3%)  | 3 (33.3%)  | 1       |
| Eosinophil percentage change         |            |            |         |
| Up                                   | 0 (0%)     | 0 (0%)     | -       |
| Down                                 | 2 (66.7%)  | 0 (0%)     | 0.045   |
| Autoimmune Diseases                  | 1 (33.3%)  | 0(0%)      | 1       |
| ECG                                  |            |            |         |

|            |           |           |      |
|------------|-----------|-----------|------|
| AF         | 1 (33.3%) | 4 (44.4%) | 1.00 |
| LBBB       | 0 (0%)    | 0 (0%)    | -    |
| PVT        | 2 (66.7%) | 4 (44.4%) | 1.00 |
| UCG        |           |           |      |
| LAD (mm)   | 43.0±7.9  | 41.3±5.1  | 1.00 |
| LVEDD (mm) | 66.0±7.6  | 68±4.4    | 0.63 |
| EF (%)     | 27.7±7.5  | 26.3±7.2  | 0.01 |
| MR         | 2 (66.7%) | 7 (77.7%) | 1.00 |

1 GCM: giant cell myocarditis; DCM: dilated cardiomyopathy; BMI: body mass index; ECG:  
2 electrocardiogram; AF: atrial fibrillation; LBBB: left bundle branch block; PVT: paroxysmal  
3 ventricular tachycardia; UCG: ultrasonic cardiogram; LAD: left atrial diameter; LVEDD: Left  
4 ventricular end diastolic diameter; EF: Ejection fraction; MR: mitral regurgitation (moderately to  
5 severe).

6

7 **Table S5. Imaging mass cytometry antibody panel**

| Cat#     | Antibody (clone)          | Metal label information | Source   |
|----------|---------------------------|-------------------------|----------|
| 3141017D | Smooth Muscle Actin (1A4) | 141Pr                   | Fluidigm |
| 3142014D | CD19 (6OMP31)             | 142Nd                   | Fluidigm |
| 3143027D | Vimentin (D21H3)          | 143Nd                   | Fluidigm |
| 3144025D | CD14 (EPR3653)            | 144Nd                   | Fluidigm |
| 3145015D | T-bet/TBX21 (D6N8B)       | 145Nd                   | Fluidigm |
| 3146020D | CD16 (EPR16784)           | 146Nd                   | Fluidigm |
| 3147021D | CD163 (EDHu-1)            | 147Sm                   | Fluidigm |
| 3148021D | CD278/ICOS (D1K2T)        | 148Nd                   | Fluidigm |
| 3149028D | CD11b (EPR1344)           | 149Sm                   | Fluidigm |
| 3150031D | PD-L1 (E1L3N)             | 150Nd                   | Fluidigm |
| 3151026D | IgM (MHM-88)              | 151Eu                   | Fluidigm |
| 3152016D | CD45 (CD45-2B11)          | 152Sm                   | Fluidigm |

|          |                              |       |          |
|----------|------------------------------|-------|----------|
| 3153028D | CD223/Lug-3 (Dug40)          | 153Eu | Fluidigm |
| 3154026D | CD11c (3.9)                  | 154Sm | Fluidigm |
| 3155016D | FoxP3 (236A/E7)              | 155Gd | Fluidigm |
| 3156033D | CD4 (EPR6855)                | 156Gd | Fluidigm |
| 3158031D | CD73 (EPR6115)               | 158Gd | Fluidigm |
| 3159035D | CD68 (KP1)                   | 159Tb | Fluidigm |
| 3160026D | CD28 (YTH913.12)             | 160Gd | Fluidigm |
| 3161029D | CD20 (H1)                    | 161Dy | Fluidigm |
| 3162035D | CD8a (D8A8Y)                 | 162Dy | Fluidigm |
| 3163030D | CD196/CCR6 (G034E3)          | 163Dy | Fluidigm |
| 3164027D | Arginase-1 (D4E3M)           | 164Dy | Fluidigm |
| 3165041D | CD279/PD-1 (EH12.2H7)        | 165Ho | Fluidigm |
| 3166031D | CD45RA (HI100)               | 166Er | Fluidigm |
| 3167021D | granzyme B (EPR20129-217)    | 167Er | Fluidigm |
| 3168022D | Ki-67 (B56)                  | 168Er | Fluidigm |
| 3169023D | Collagen Type I (Polyclonal) | 169Tm | Fluidigm |
| 3170022D | CD3 (UCHT1)                  | 170Er | Fluidigm |
| 3171025D | CD27 (LG.3A10)               | 171Yb | Fluidigm |
| 3172027D | Cleaved Caspase 3 (5A1E)     | 172Yb | Fluidigm |
| 3173016D | CD45RO (UCHL1)               | 173Yb | Fluidigm |
| 3174025D | HLA-DR (LN3)                 | 174Yb | Fluidigm |
| 3175036D | CD25 (EPR6452)               | 175Lu | Fluidigm |
| 3176026D | Perforin (dG9)               | 176Yb | Fluidigm |

1

2

3 **Table S6.** Compare macrophages between cardiac sarcoidosis and giant cell myocarditis.

| Cell cluster | Cell number | Maker genes | Major function | Peak phase | Corresponding to cardiac |
|--------------|-------------|-------------|----------------|------------|--------------------------|
|--------------|-------------|-------------|----------------|------------|--------------------------|



| (Naming in GCM) |      |                           |                                                                                   |     | sarcoidosis (CS) |
|-----------------|------|---------------------------|-----------------------------------------------------------------------------------|-----|------------------|
| Macro_1         | 1646 | Prdx1, Prdx5, Ass1, Arg1  | inflammatory response, antigen processing and presentation                        | GCM |                  |
| Macro_2         | 922  | Ms4a7, Tmem176a, Tmem176b | antigen processing and presentation of exogenous peptide antigen via MHC class II | GCM | Mac_HLA          |
| Macro_3         | 1077 | Nr4a1                     | regulation of cell activation, positive regulation of cell death                  | CTL | Mac_res          |
| Macro_4         | 798  | Pf4                       | inflammatory response, response to type II interferon                             | CTL | Mono             |
| Macro_5         | 841  | Fcnb, Plac8, Vcan         | Inflammatory response, response to IFN- $\beta$                                   | GCM | Mac_VCAN         |

1

2

3

1 Supplemental Figures and legends

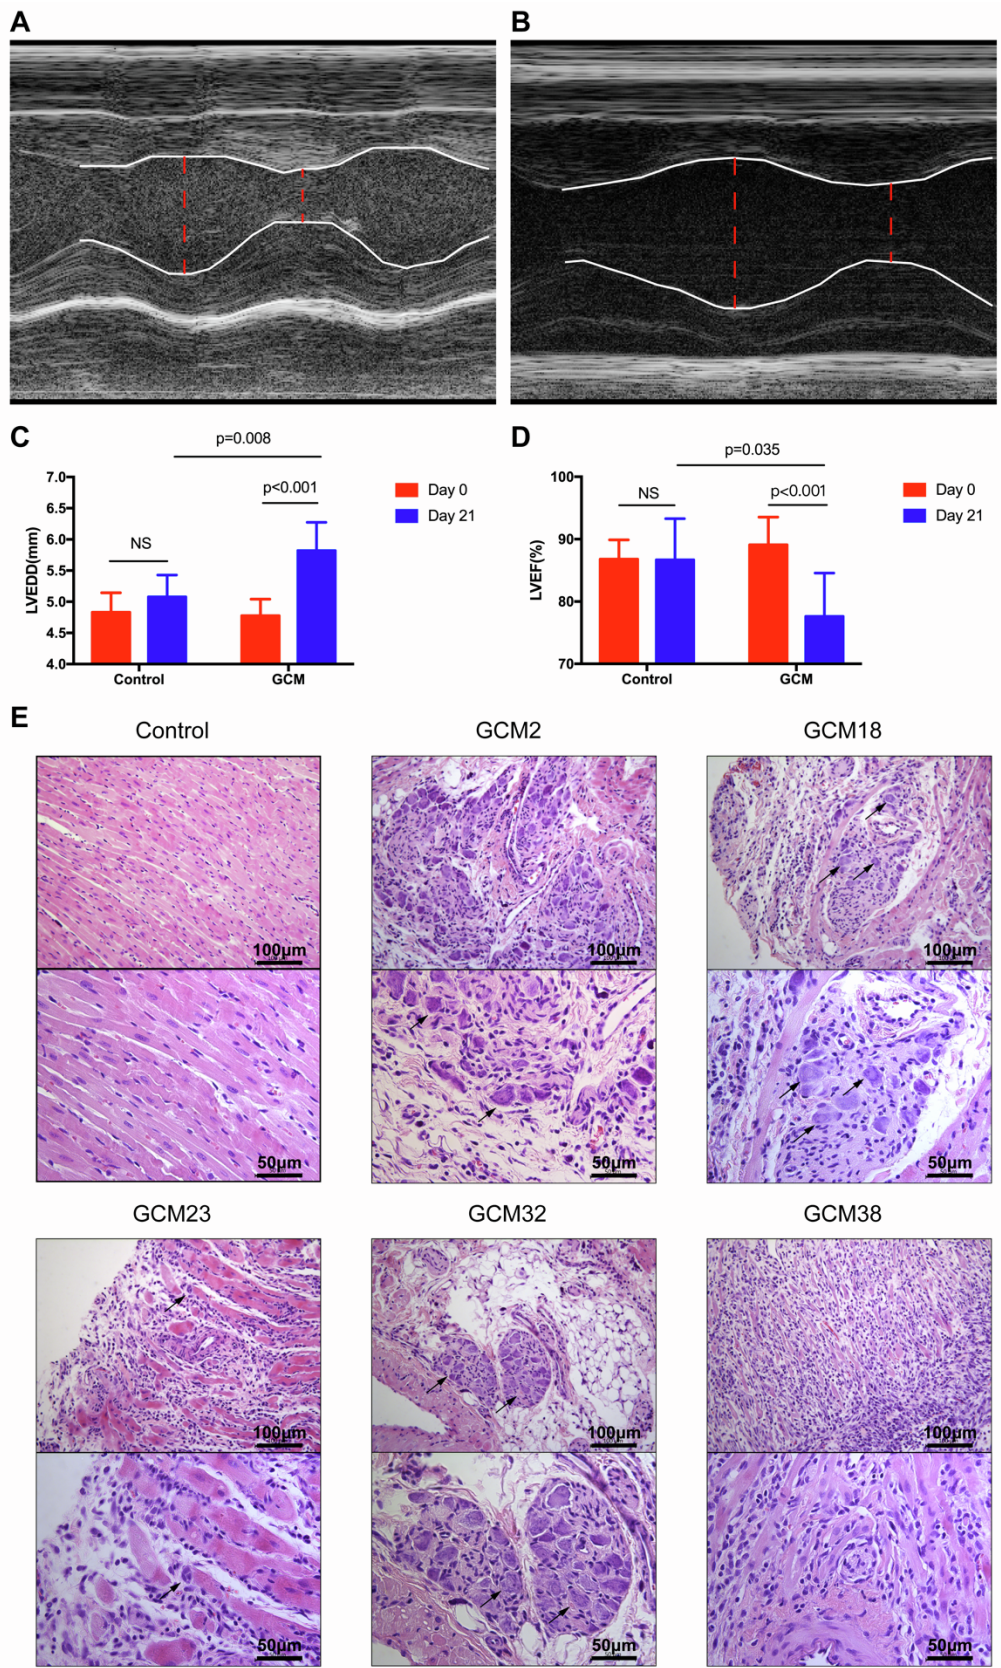

2

3 Figure S1. The phenotype of GCM. A-B. The short axis performance of control (A) and

1 GCM (B). C-D. Statistical analysis of LVEDD (C) and LVEF(D) between GCM and normal  
2 group. E. The typical histological performance of the GCM model. LVEF: left ventricular  
3 ejection fraction; LVEDD: left ventricular end-diastolic dimension.  $n = 5$ , ns, not significant,  
4 One-way ANOVA. Data are presented as mean  $\pm$  SEM.

5  
6

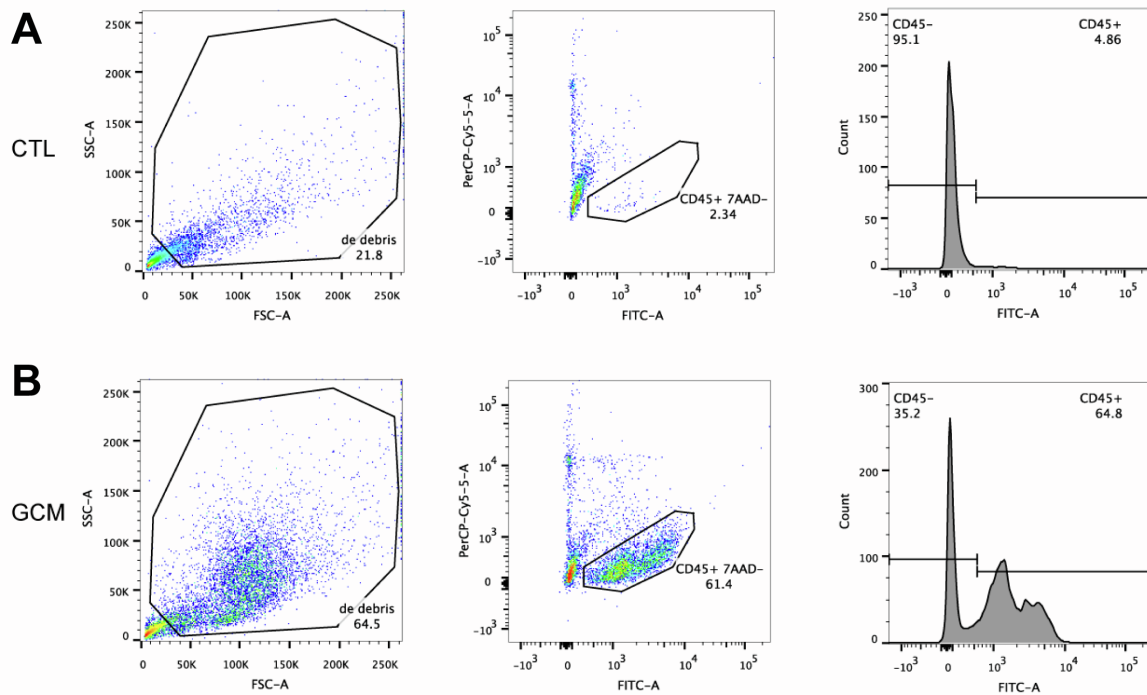

7  
8 **Figure S2. The live immune cell percentage derived by flow cytometry analysis.** A-B. The  
9 gating strategy to sort live immune cells and the percentage of immune cells of CTL (A) and  
10 GCM (B). CTL: control; GCM: giant cell myocarditis.

11

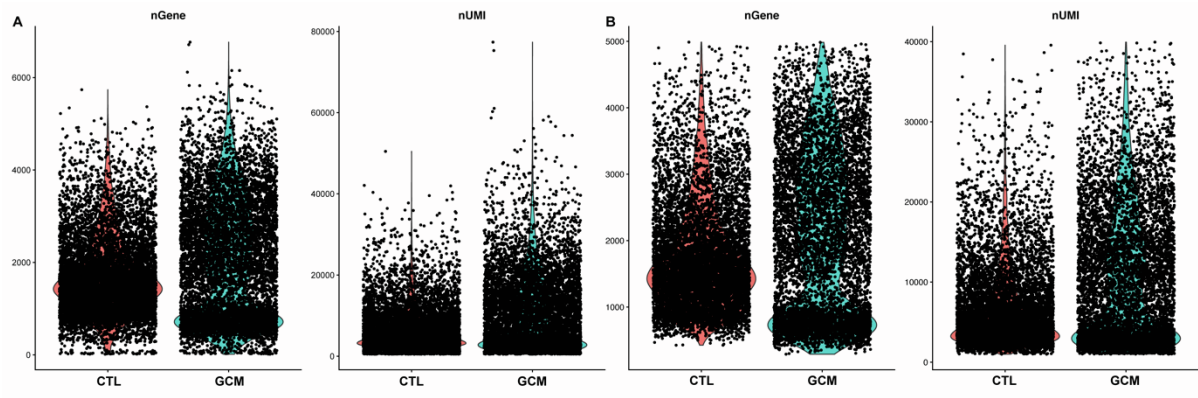

1

2 **Figure S3. The gene and UMI distributions in CTL and GCM.** A. The gene number  
 3 distribution (left) and UMI count number distribution (right) of immune cells in CTL and GCM  
 4 before quality control. B. The gene number distribution (left) and UMI count number  
 5 distribution (right) of immune cells in CTL and GCM after quality control. UMI: unique  
 6 molecular identifier.

7

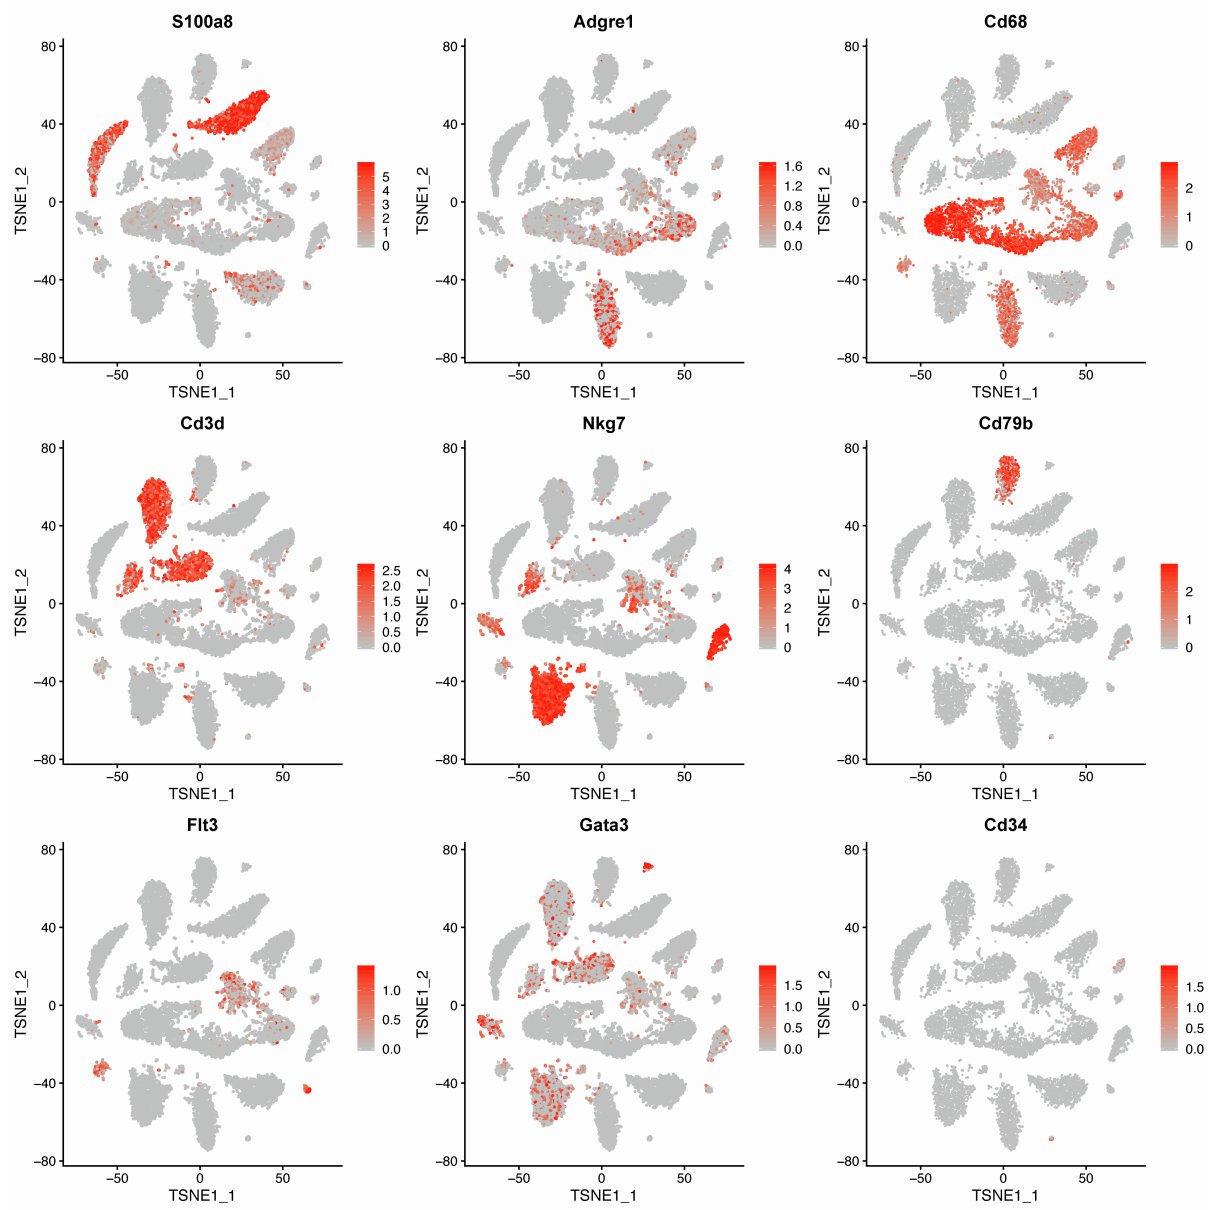

1

2 **Figure S4. Feature plots of hallmark genes to identify the cell types.**

3

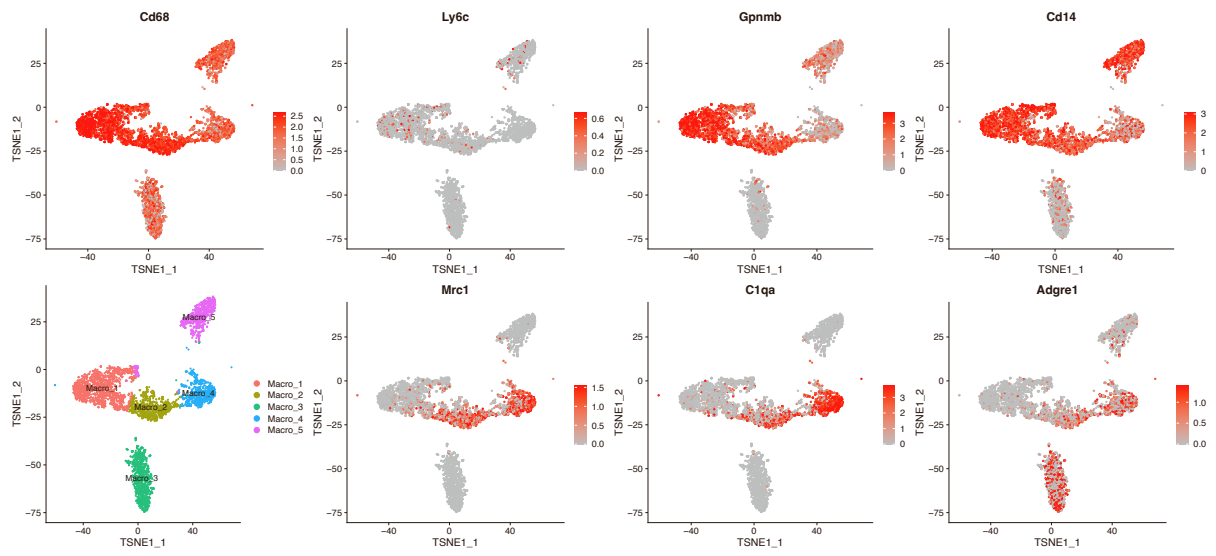

1

2 **Figure S5. Feature plots of hallmark genes to identify the macrophages origin.**

3

4

**A**

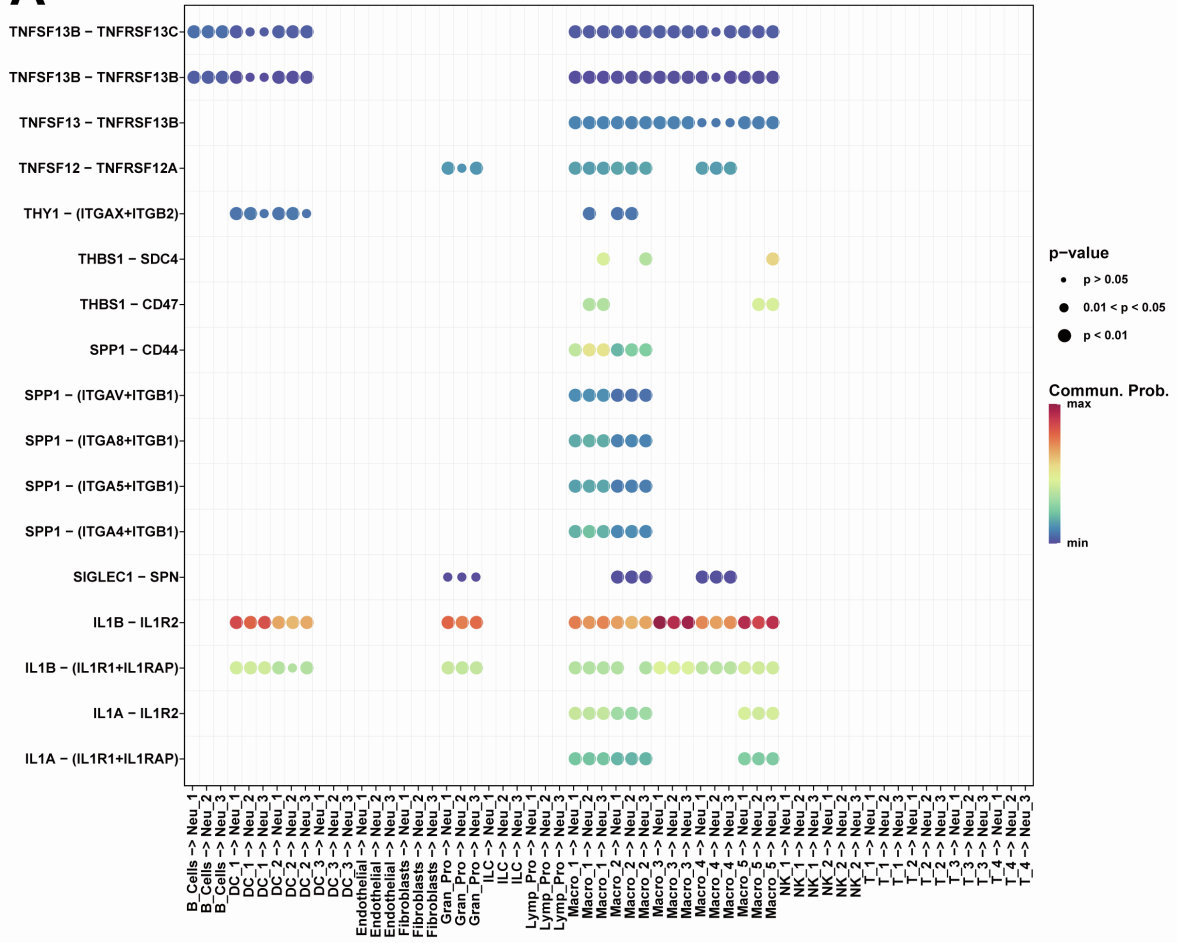

**B**

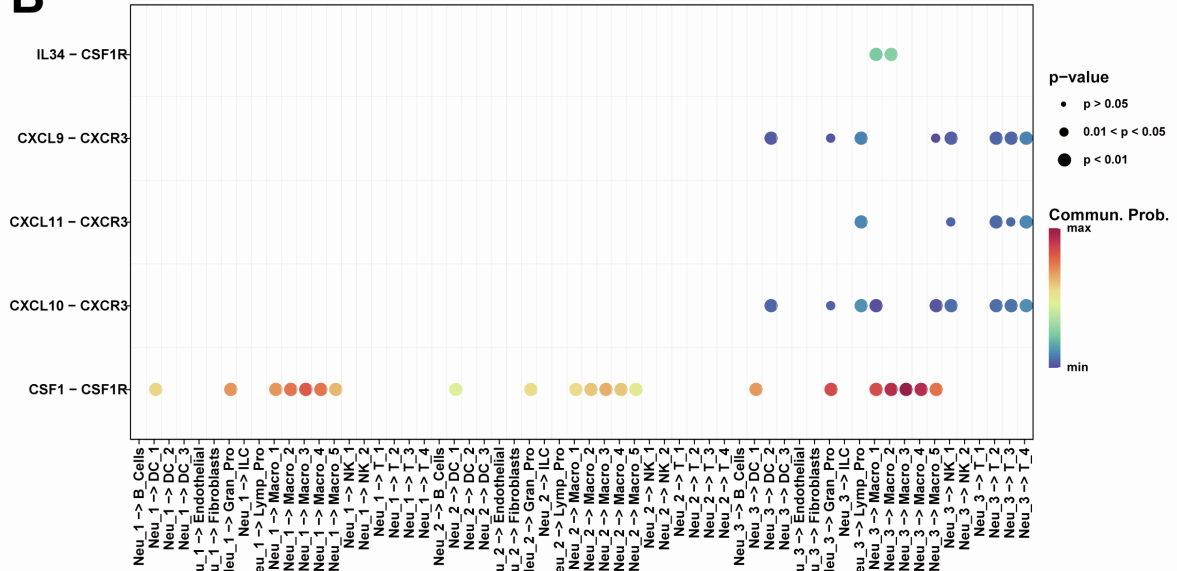

1 **Figure S6. Intercellular communication network analysis revealed that the roles of**  
 2 **NETosis in GCM.** A. From the source sets to the target sets (Neu\_1, Neu\_2, Neu\_3). B.  
 3 From the source sets (Neu\_1, Neu\_2, Neu\_3) to the target sets.  
 4

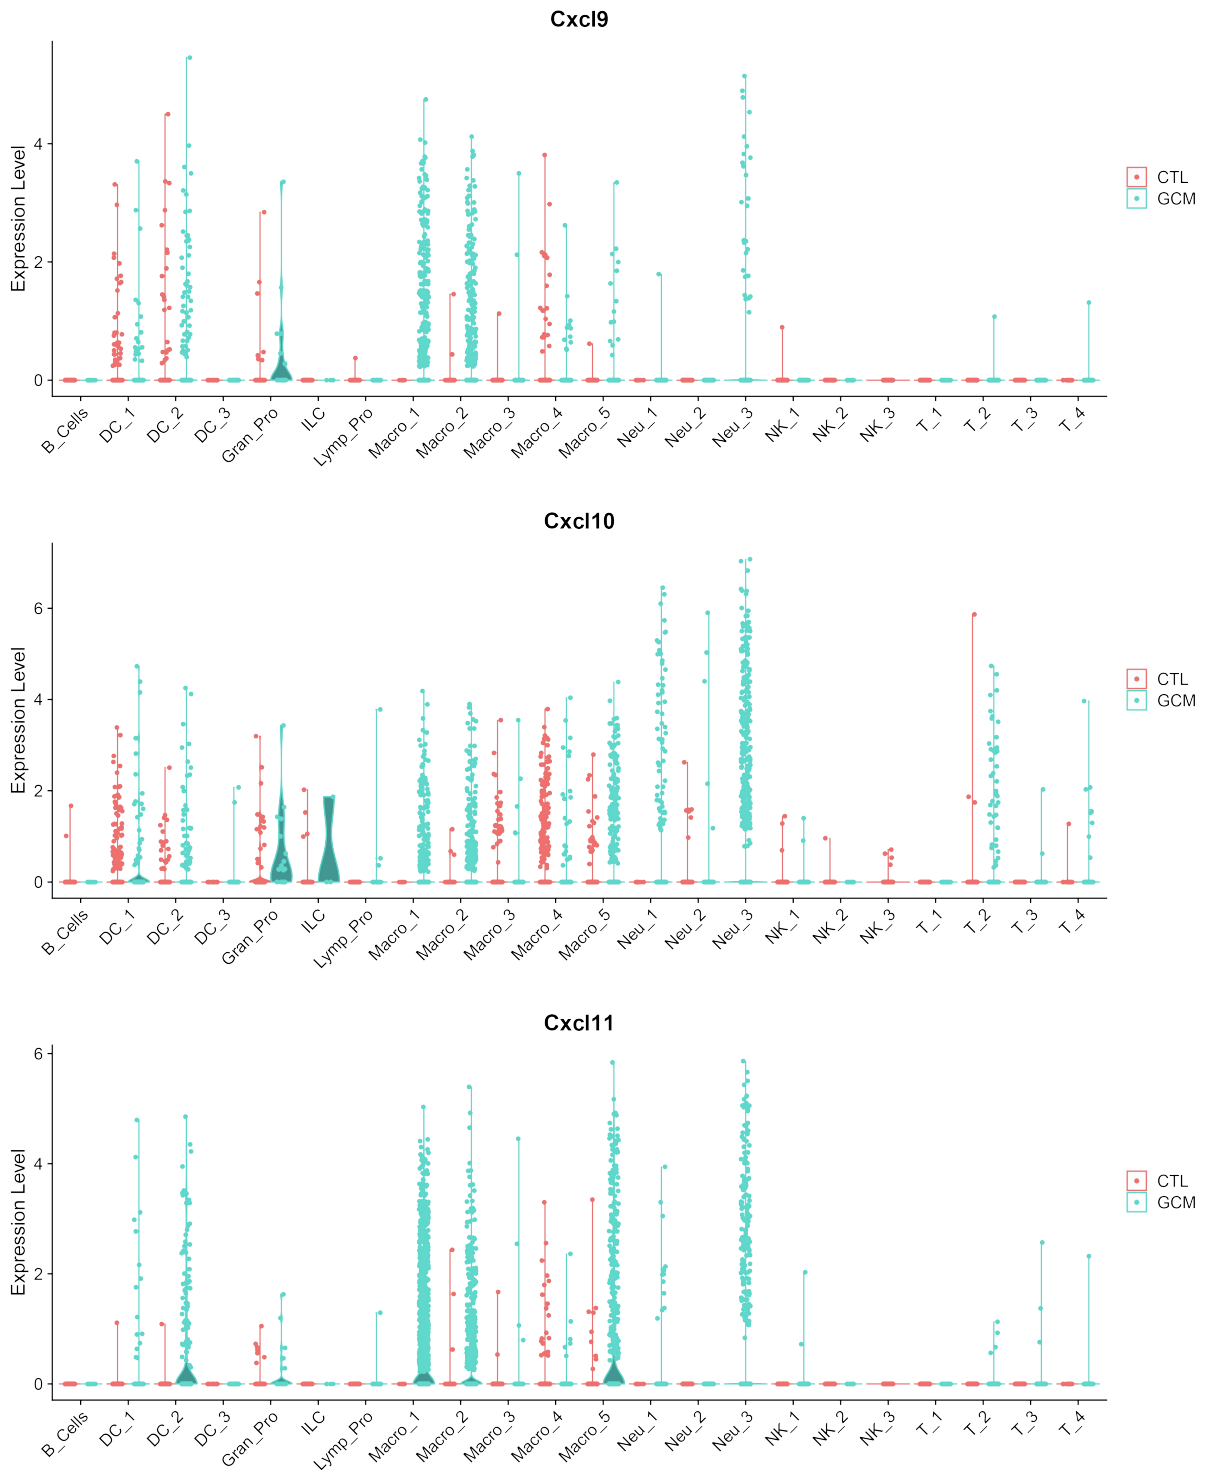

5  
 6 **Figure S7. CXCL chemokines expression in cell clusters from different groups.**



1

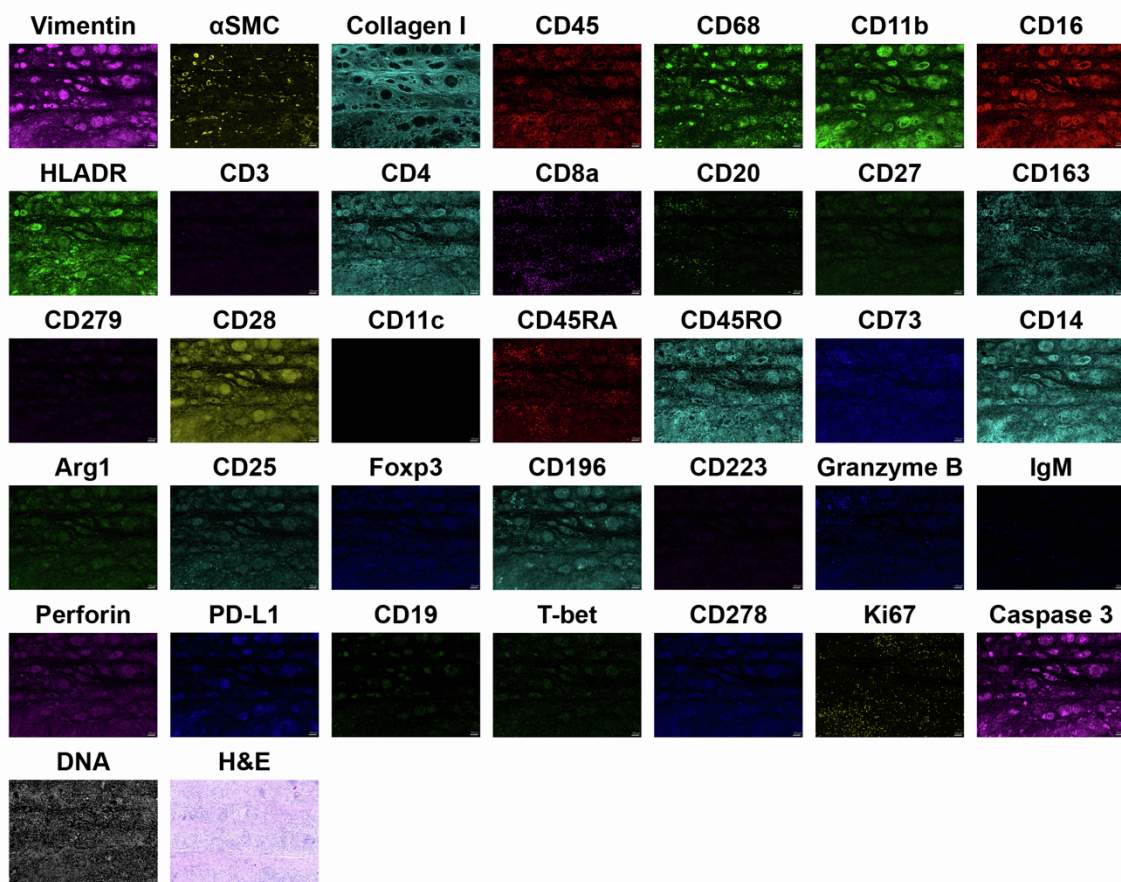

2

3 **Figure S8. Single color staining of 35-marker panel.** Heart tissue from the GCM patient was  
4 scanned by IMC with a 35-marker panel. The same region as Figure 6 with indicated marker  
5 above each plot.

6

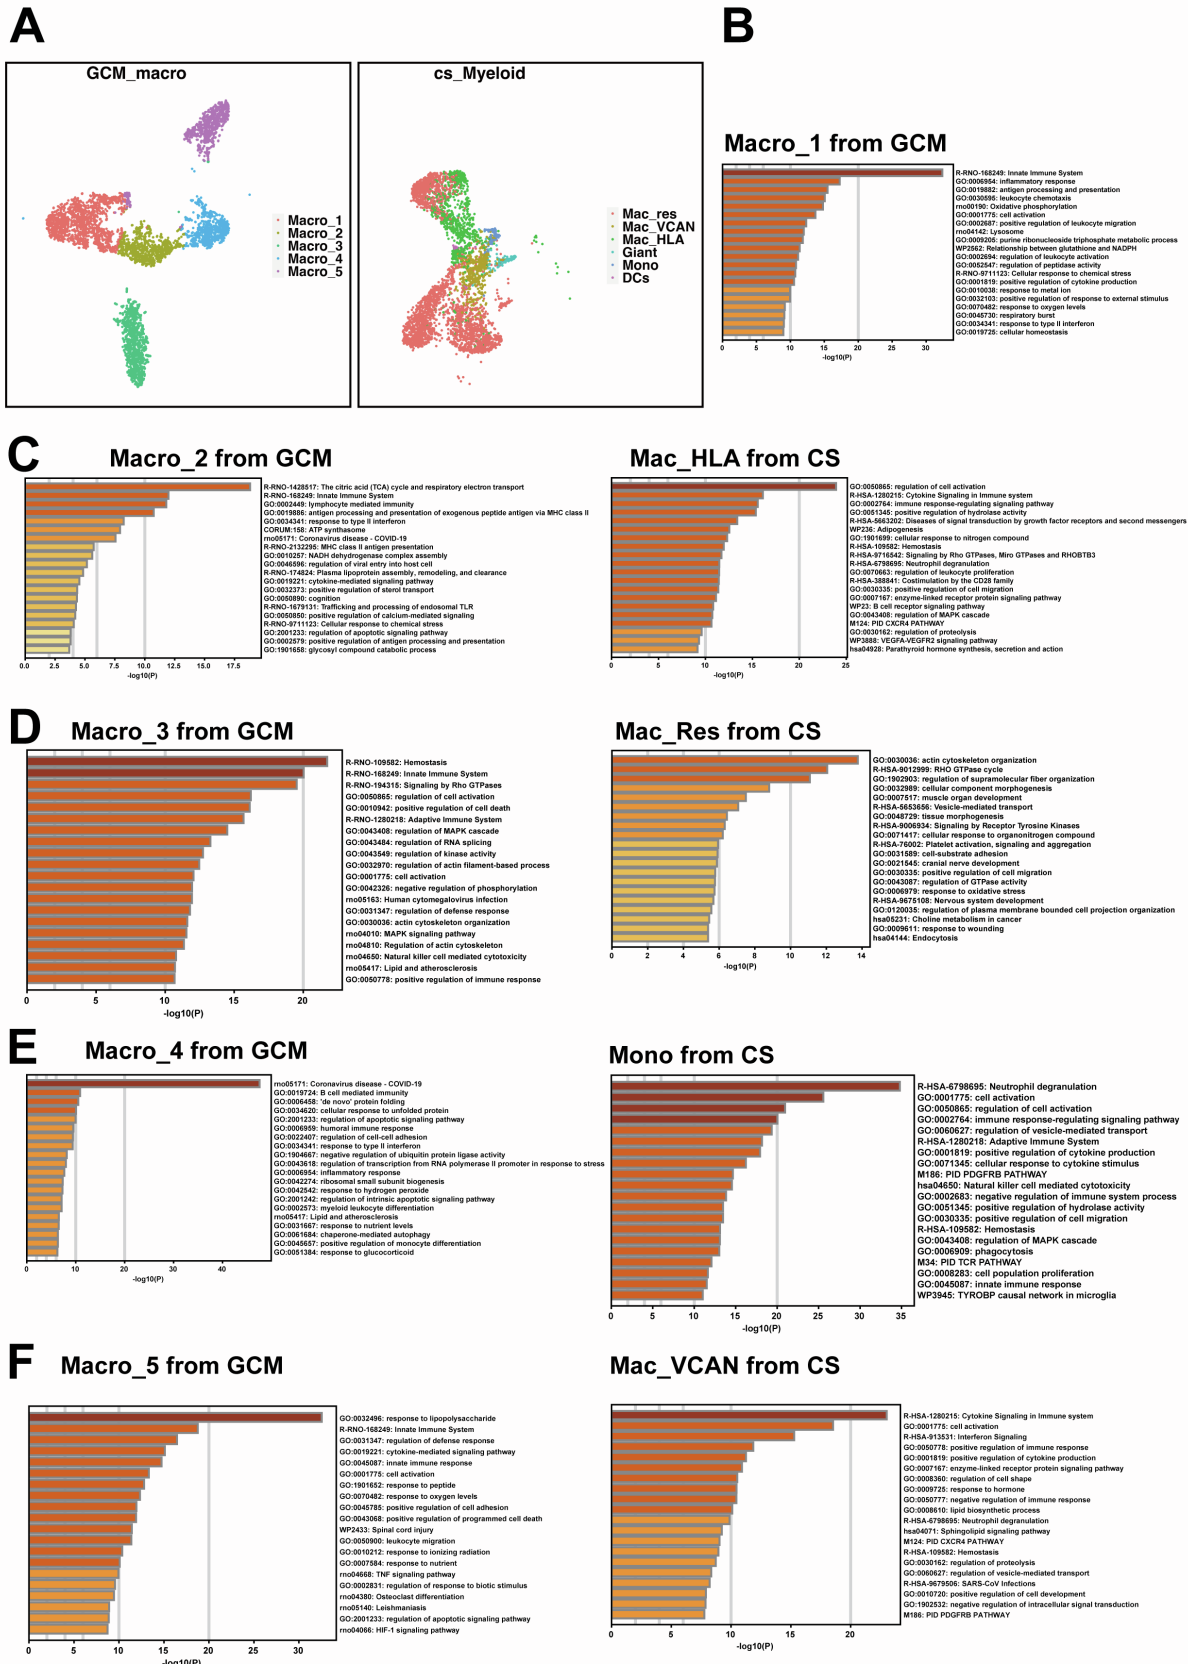

1  
2 **Figure S9. Compare macrophages clusters between GCM and CS. A. The UMAP**  
3 **projection of five macrophage clusters of our giant cell myocarditis (GCM) and six myeloid**

1 cell clusters of cardiac sarcoidosis (CS). B. The enrichment result of Macro\_1. C. The  
2 enrichment results of Macro\_2 and Mac\_HLA. D. The enrichment results of Macro\_3 and  
3 Mac\_res. E. The enrichment results of Macro\_4 and Mono. F. The enrichment results of  
4 Macro\_5 and Mac\_VCAN.
